# Supplementary material for: MaizeCODE reveals bi-directionally expressed enhancers that harbor molecular signatures of maize domestication
Source: PubMed Central journal article supplement (PMC11685423; doi:10.1038/s41467-024-55195-w), 2024-12-30
Supplement: 41467_2024_55195_MOESM3_ESM.pdf [file 41467_2024_55195_MOESM3_ESM.pdf]

## **Description of Additional Supplementary files**

**Supplementary Data 1.** List of differentially expressed genes in all pairwise comparisons. Each sheet corresponds to one inbred.

**Supplementary Data 2.** Metrics of all ChIPseq, RNA, RAMPAGE and short RNA datasets. The first few lines of each sheet contain descriptions of each column.
